# Supplementary material for: l-Type amino acid transporter 1 in hypothalamic neurons in mice maintains energy and bone homeostasis
Source: PubMed Central journal article supplement (PMC10132163; doi:10.1172/jci.insight.154925), 2023-04-10
Supplement: jciinsight-8-154925-s073.pdf [file jciinsight-8-154925-s073.pdf]

1 **Supplemental Table**

2 **Supplemental Table 1. Bone parameters measured by  $\mu$ CT in *LepR-Cre;Slc7a5<sup>fl/fl</sup>* mice.**

3

|                                               | <i>Slc7a5<sup>fl/fl</sup></i> | <i>LepR-Cre;Slc7a5<sup>fl/fl</sup></i> |
|-----------------------------------------------|-------------------------------|----------------------------------------|
| <b>TV (mm<sup>3</sup>)</b>                    | 2.05 ± 0.06                   | 2.17 ± 0.08                            |
| <b>BV (mm<sup>3</sup>)</b>                    | 0.38 ± 0.02                   | 0.49 ± 0.04 *                          |
| <b>BS (mm<sup>2</sup>)</b>                    | 19.14 ± 0.74                  | 23.11 ± 1.27 *                         |
| <b>BS/BV (mm<sup>-1</sup>)</b>                | 51.41 ± 1.6                   | 48.36 ± 1.44                           |
| <b>Tb.Th (μm)</b>                             | 57.39 ± 1.88                  | 60.97 ± 1.49                           |
| <b>Tb.N (mm<sup>-1</sup>)</b>                 | 2.29 ± 0.3                    | 2.31 ± 0.09                            |
| <b>Tb.Sp (μm)</b>                             | 142.24 ± 3.44                 | 127.75 ± 3.39 **                       |
| <b>Tb.Spac (μm)</b>                           | 199.63 ± 4.4                  | 188.72 ± 3.56                          |
| <b>Trabecular BMD (mg cm<sup>-3</sup>)</b>    | 618.59 ± 11.56                | 624.38 ± 9.72                          |
| <b>Trabecular BMC (mg)</b>                    | 0.24 ± 0.02                   | 0.31 ± 0.02 *                          |
| <b>Trabecular BMC/TV (mg cm<sup>-3</sup>)</b> | 114.57 ± 6.9                  | 139.58 ± 8.39 *                        |
| <b>Cortical BMD (mg cm<sup>-3</sup>)</b>      | 974.66 ± 26.05                | 977.18 ± 21.43                         |
| <b>Cortical BMC (mg)</b>                      | 1.15 ± 0.05                   | 1.17 ± 0.03                            |
| <b>Cortical BV (mm<sup>3</sup>)</b>           | 1.18 ± 0.03                   | 1.2 ± 0.03                             |

4 Data are represented as mean ± SE.

5 \* $P < 0.05$ , \*\* $P < 0.01$  vs *Slc7a5<sup>fl/fl</sup>*

6

7 **Supplemental Table 2. Bone histomorphometric parameters in *LepR-Cre;Slc7a5<sup>fl/fl</sup>* mice.**

8

|                   | <i>Slc7a5<sup>fl/fl</sup></i> | <i>LepR-Cre;Slc7a5<sup>fl/fl</sup></i> |
|-------------------|-------------------------------|----------------------------------------|
| <b>N.Ob/B.Pm</b>  | 25.71 ± 3.62                  | 27.34 ± 0.99                           |
| <b>Ob.S/B.S</b>   | 18.65 ± 3.18                  | 18.06 ± 1.43                           |
| <b>N.Ob/Ob.Pm</b> | 126.84 ± 2.91                 | 143.01 ± 6.47                          |

9 Data are represented as mean ± SE.

10

11 Supplemental Table 3. Bone parameters measured by  $\mu$ CT in *LepR-Cre;Slc7a5<sup>fl/fl</sup>* mice  
 12 administrated with isoproterenol.

13

|                                               | <i>Slc7a5<sup>fl/fl</sup></i> | <i>LepR-Cre;Slc7a5<sup>fl/fl</sup></i> | <i>LepR-Cre;Slc7a5<sup>fl/fl</sup></i> |
|-----------------------------------------------|-------------------------------|----------------------------------------|----------------------------------------|
|                                               | PBS                           | PBS                                    | Isoproterenol                          |
| <b>TV (mm<sup>3</sup>)</b>                    | 1.96 ± 0.10                   | 2.08 ± 0.09                            | 1.93 ± 0.10                            |
| <b>BV (mm<sup>3</sup>)</b>                    | 0.3 ± 0.03                    | 0.41 ± 0.03 *                          | 0.28 ± 0.05 #                          |
| <b>BS (mm<sup>2</sup>)</b>                    | 13.36 ± 1.20                  | 19.18 ± 1.12 **                        | 12.55 ± 1.69 ##                        |
| <b>BS/BV (mm<sup>-1</sup>)</b>                | 45.03 ± 1.65                  | 46.70 ± 1.55                           | 47.27 ± 2.77                           |
| <b>Tb.Th (μm)</b>                             | 44.92 ± 1.55                  | 43.29 ± 1.55                           | 43.46 ± 2.19                           |
| <b>Tb.N (mm<sup>-1</sup>)</b>                 | 3.37 ± 0.20                   | 4.62 ± 0.18 ***                        | 3.20 ± 0.33 ##                         |
| <b>Tb.Sp (μm)</b>                             | 263.65 ± 21.93                | 176.54 ± 9.33 **                       | 303.77 ± 41.31 #                       |
| <b>Tb.Spac (μm)</b>                           | 308.57 ± 21.81                | 219.83 ± 9.40 **                       | 347.23 ± 39.26 ##                      |
| <b>Trabecular BMD (mg cm<sup>-3</sup>)</b>    | 568.9 ± 17.2                  | 524.59 ± 20.56                         | 561.36 ± 19.39                         |
| <b>Trabecular BMC (mg)</b>                    | 0.17 ± 0.02                   | 0.22 ± 0.02                            | 0.16 ± 0.03                            |
| <b>Trabecular BMC/TV (mg cm<sup>-3</sup>)</b> | 85.28 ± 6.80                  | 104.76 ± 7.83                          | 82.82 ± 12.45                          |
| <b>Cortical BMD (mg cm<sup>-3</sup>)</b>      | 978.16 ± 14.74                | 955.37 ± 22.17                         | 966.06 ± 15.92                         |
| <b>Cortical BMC (mg)</b>                      | 1.15 ± 0.06                   | 1.10 ± 0.06                            | 1.11 ± 0.06                            |
| <b>Cortical BV (mm<sup>3</sup>)</b>           | 1.17 ± 0.06                   | 1.15 ± 0.04                            | 1.15 ± 0.05                            |

14 Data are represented as mean ± SE.

15 \* $P < 0.05$ , \*\* $P < 0.01$ , \*\*\* $P < 0.001$  vs *Slc7a5<sup>fl/fl</sup>/PBS*

16 # $P < 0.05$ , ## $P < 0.01$  vs *LepR-Cre;Slc7a5<sup>fl/fl</sup>/PBS*

17

18 **Supplemental Table 4. Bone parameters measured by  $\mu$ CT in *LepR-Cre* mice.**

19

|                                               | <b>WT</b>          | <i>LepR-Cre</i>      |
|-----------------------------------------------|--------------------|----------------------|
| <b>TV (mm<sup>3</sup>)</b>                    | 1.93 $\pm$ 0.05    | 2.05 $\pm$ 0.05      |
| <b>BV (mm<sup>3</sup>)</b>                    | 0.37 $\pm$ 0.01    | 0.32 $\pm$ 0.03      |
| <b>BS (mm<sup>2</sup>)</b>                    | 17.73 $\pm$ 1.06   | 15.67 $\pm$ 0.88     |
| <b>BS/BV (mm<sup>-1</sup>)</b>                | 47.28 $\pm$ 2.15   | 49.35 $\pm$ 2.53     |
| <b>BV/TV (%)</b>                              | 19.44 $\pm$ 0.97   | 15.76 $\pm$ 1.25     |
| <b>Tb.Th (<math>\mu</math>m)</b>              | 42.59 $\pm$ 2.10   | 41.06 $\pm$ 2.11     |
| <b>Tb.N (mm<sup>-1</sup>)</b>                 | 4.60 $\pm$ 0.33    | 3.83 $\pm$ 0.18      |
| <b>Tb.Sp (<math>\mu</math>m)</b>              | 178.36 $\pm$ 15.10 | 223.41 $\pm$ 13.65   |
| <b>Tb.Spac (<math>\mu</math>m)</b>            | 220.95 $\pm$ 16.67 | 264.47 $\pm$ 13.01   |
| <b>Trabecular BMD (mg cm<sup>-3</sup>)</b>    | 529.60 $\pm$ 30.12 | 645.38 $\pm$ 67.34   |
| <b>Trabecular BMC (mg)</b>                    | 0.20 $\pm$ 0.01    | 0.20 $\pm$ 0.02      |
| <b>Trabecular BMC/TV (mg cm<sup>-3</sup>)</b> | 101.65 $\pm$ 5.22  | 98.47 $\pm$ 7.90     |
| <b>Cortical BMD (mg cm<sup>-3</sup>)</b>      | 962.30 $\pm$ 35.74 | 1132.00 $\pm$ 103.07 |
| <b>Cortical BMC (mg)</b>                      | 1.18 $\pm$ 0.14    | 1.21 $\pm$ 0.10      |
| <b>Cortical BV (mm<sup>3</sup>)</b>           | 1.22 $\pm$ 0.10    | 1.08 $\pm$ 0.06      |

20 Data are represented as mean  $\pm$  SE.

21

22 Supplemental Table 5. Bone parameters measured by  $\mu$ CT in *LepR-Cre;Slc7a5<sup>fl/fl</sup>*  
 23 /AAV-*Slc7a5* mice.

24

|                                          | <i>LepR-Cre</i> | <i>LepR-Cre;</i><br><i>Slc7a5<sup>fl/fl</sup></i> | <i>LepR-Cre</i>    | <i>LepR-Cre;</i><br><i>Slc7a5<sup>fl/fl</sup></i> |
|------------------------------------------|-----------------|---------------------------------------------------|--------------------|---------------------------------------------------|
|                                          | AAV-Control     | AAV-Control                                       | AAV- <i>Slc7a5</i> | AAV- <i>Slc7a5</i>                                |
| TV (mm <sup>3</sup> )                    | 2.33 ± 0.07     | 2.28 ± 0.08                                       | 2.43 ± 0.08        | 2.1 ± 0.07 †                                      |
| BV (mm <sup>3</sup> )                    | 0.38 ± 0.03     | 0.5 ± 0.02                                        | 0.36 ± 0.02        | 0.3 ± 0.05 ###                                    |
| BS (mm <sup>2</sup> )                    | 20.44 ± 0.95    | 24.48 ± 0.79                                      | 19.73 ± 0.8        | 16.29 ± 1.69 ###                                  |
| BS/BV (mm <sup>-1</sup> )                | 55.08 ± 1.94    | 49.35 ± 2.18                                      | 55.31 ± 0.79       | 56.63 ± 3.29                                      |
| Tb.Th (μm)                               | 36.84 ± 1.51    | 41.01 ± 1.81                                      | 36.19 ± 0.52       | 36.05 ± 2.12                                      |
| Tb.N (mm <sup>-1</sup> )                 | 4.38 ± 0.12     | 5.37 ± 0.13 **                                    | 4.06 ± 0.1         | 3.85 ± 0.34 ###                                   |
| Tb.Sp (μm)                               | 193.32 ± 6.85   | 145.77 ± 5.34                                     | 210.87 ± 6.85      | 238.57 ± 30.23 ##                                 |
| Tb.Spac (μm)                             | 230.15 ± 6.16   | 186.77 ± 4.17                                     | 247.06 ± 6.6       | 274.61 ± 28.47 ##                                 |
| Trabecular BMD (mg cm <sup>-3</sup> )    | 614.55 ± 11.65  | 631.91 ± 19.86                                    | 599.08 ± 6.44      | 592.1 ± 14.1                                      |
| Trabecular BMC (mg)                      | 0.24 ± 0.02     | 0.32 ± 0.02                                       | 0.22 ± 0.01        | 0.19 ± 0.03 ##                                    |
| Trabecular BMC/TV (mg cm <sup>-3</sup> ) | 100.57 ± 7.42   | 140.36 ± 12.62 *                                  | 88.77 ± 3.74       | 85.94 ± 13.35 ##                                  |
| Cortical BMD (mg cm <sup>-3</sup> )      | 1008.19 ± 11.4  | 1002.66 ± 11.86                                   | 1027.58 ± 5.92     | 1041.4 ± 12.86                                    |
| Cortical BMC (mg)                        | 1.11 ± 0.04     | 1.25 ± 0.05                                       | 1.11 ± 0.02        | 1.16 ± 0.04                                       |
| Cortical BV (mm <sup>3</sup> )           | 1.1 ± 0.03      | 1.25 ± 0.04 *                                     | 1.08 ± 0.02        | 1.12 ± 0.04                                       |

25 Data are represented as mean ± SE.

26 \**P* < 0.05, \*\**P* < 0.01 vs *LepR-Cre/AAV-Control*

27 †*P* < 0.05 vs *LepR-Cre/AAV-Slc7a5*

28 ###*P* < 0.01, ####*P* < 0.001 vs *LepR-Cre;Slc7a5<sup>fl/fl</sup>/AAV-Control*

29

30 Supplemental Table 6. Bone parameters measured by  $\mu$ CT in *LepR-Cre;Slc7a5<sup>fl/fl</sup>;Tsc1<sup>fl/+</sup>*  
 31 mice.

32

|                                               | <i>Slc7a5<sup>fl/fl</sup></i> | <i>LepR-Cre;Slc7a5<sup>fl/fl</sup></i> | <i>LepR-Cre;<br/>Slc7a5<sup>fl/fl</sup>;Tsc1<sup>fl/+</sup></i> |
|-----------------------------------------------|-------------------------------|----------------------------------------|-----------------------------------------------------------------|
| <b>TV (mm<sup>3</sup>)</b>                    | 2.01 $\pm$ 0.04               | 2.35 $\pm$ 0.08 **                     | 1.98 $\pm$ 0.12 #                                               |
| <b>BV (mm<sup>3</sup>)</b>                    | 0.36 $\pm$ 0.02               | 0.58 $\pm$ 0.04 ***                    | 0.37 $\pm$ 0.04 ##                                              |
| <b>BS (mm<sup>2</sup>)</b>                    | 18.93 $\pm$ 0.72              | 26.58 $\pm$ 1.54 ***                   | 19.31 $\pm$ 2.23 ##                                             |
| <b>BS/BV (mm<sup>-1</sup>)</b>                | 52.79 $\pm$ 1.4               | 46.37 $\pm$ 1.1 *                      | 52.78 $\pm$ 0.69                                                |
| <b>Tb.Th (<math>\mu</math>m)</b>              | 18.04 $\pm$ 0.88              | 24.36 $\pm$ 1 ***                      | 18.41 $\pm$ 1.21 #                                              |
| <b>Tb.N (mm<sup>-1</sup>)</b>                 | 57.35 $\pm$ 0.95              | 61.05 $\pm$ 0.95                       | 57.4 $\pm$ 1.92                                                 |
| <b>Tb.Sp (<math>\mu</math>m)</b>              | 2.01 $\pm$ 0.06               | 2.51 $\pm$ 0.09 ***                    | 2.01 $\pm$ 0.13 ##                                              |
| <b>Tb.Spac (<math>\mu</math>m)</b>            | 139.03 $\pm$ 2.52             | 123.01 $\pm$ 3.84 **                   | 134.31 $\pm$ 6.31                                               |
| <b>Trabecular BMD (mg cm<sup>-3</sup>)</b>    | 196.38 $\pm$ 2.49             | 184.06 $\pm$ 4.26                      | 191.71 $\pm$ 8.17                                               |
| <b>Trabecular BMC (mg)</b>                    | 599.56 $\pm$ 6.83             | 633.75 $\pm$ 10.42 *                   | 596.3 $\pm$ 8.37                                                |
| <b>Trabecular BMC/TV (mg cm<sup>-3</sup>)</b> | 0.22 $\pm$ 0.01               | 0.37 $\pm$ 0.03 ***                    | 0.22 $\pm$ 0.02 ##                                              |
| <b>Cortical BMD (mg cm<sup>-3</sup>)</b>      | 108.61 $\pm$ 5.97             | 153.9 $\pm$ 8.1 ***                    | 109.5 $\pm$ 6.11 #                                              |
| <b>Cortical BMC (mg)</b>                      | 981.61 $\pm$ 22.62            | 977.88 $\pm$ 25.29                     | 1023.77 $\pm$ 17.98                                             |
| <b>Cortical BV (mm<sup>3</sup>)</b>           | 1.1 $\pm$ 0.04                | 1.22 $\pm$ 0.06                        | 1.11 $\pm$ 0.07                                                 |
| <b>Cortical BV (mm<sup>3</sup>)</b>           | 1.12 $\pm$ 0.03               | 1.24 $\pm$ 0.03 *                      | 1.08 $\pm$ 0.06                                                 |

33 Data are represented as mean  $\pm$  SE.

34 \* $P$  < 0.05, \*\* $P$  < 0.01, \*\*\* $P$  < 0.001 vs *Slc7a5<sup>fl/fl</sup>*

35 # $P$  < 0.05, ## $P$  < 0.01 vs *LepR-Cre;Slc7a5<sup>fl/fl</sup>*

36

37 **Supplemental Table 7. Bone parameters measured by  $\mu$ CT in *LepR-Cre;Tsc1<sup>fl/+</sup>* mice.**

38

|                                               | <i>Tsc1<sup>fl/+</sup></i> | <i>LepR-Cre;Tsc1<sup>fl/+</sup></i> |
|-----------------------------------------------|----------------------------|-------------------------------------|
| <b>TV (mm<sup>3</sup>)</b>                    | 1.98 ± 0.13                | 2.13 ± 0.09                         |
| <b>BV (mm<sup>3</sup>)</b>                    | 0.27 ± 0.08                | 0.28 ± 0.03                         |
| <b>BS (mm<sup>2</sup>)</b>                    | 15.61 ± 2.92               | 16.93 ± 1.88                        |
| <b>BS/BV (mm<sup>-1</sup>)</b>                | 62.90 ± 4.97               | 60.45 ± 2.04                        |
| <b>Tb.Th (μm)</b>                             | 13.05 ± 2.86               | 13.13 ± 1.28                        |
| <b>Tb.N (mm<sup>-1</sup>)</b>                 | 32.78 ± 3.12               | 33.23 ± 1.08                        |
| <b>Tb.Sp (μm)</b>                             | 3.83 ± 0.47                | 3.94 ± 0.33                         |
| <b>Tb.Spac (μm)</b>                           | 242.90 ± 32.84             | 229.93 ± 28.18                      |
| <b>Trabecular BMD (mg cm<sup>-3</sup>)</b>    | 275.68 ± 30.38             | 263.16 ± 27.87                      |
| <b>Trabecular BMC (mg)</b>                    | 739.28 ± 40.88             | 758.48 ± 32.21                      |
| <b>Trabecular BMC/TV (mg cm<sup>-3</sup>)</b> | 0.21 ± 0.07                | 0.22 ± 0.03                         |
| <b>Cortical BMD (mg cm<sup>-3</sup>)</b>      | 100.36 ± 27.98             | 100.2 ± 11.73                       |
| <b>Cortical BMC (mg)</b>                      | 1490.18 ± 66.79            | 1479.64 ± 48.71                     |
| <b>Cortical BV (mm<sup>3</sup>)</b>           | 1.44 ± 0.14                | 1.43 ± 0.07                         |
| <b>Cortical BV (mm<sup>3</sup>)</b>           | 0.97 ± 0.10                | 0.96 ± 0.02                         |

39 Data are represented as mean ± SE.

40

41 **Supplemental Table 8. List of primers used for genotyping.**

| Gene                   | Forward (5'-3')                    | Reverse (5'-3')                    |
|------------------------|------------------------------------|------------------------------------|
| <i>Slc7a5 flox</i>     | GGCTCCTGGACTTATCTTGACCAAT          | AGATAATGTGGTCACACATCTGGAAG         |
| <i>Tsc1 flox</i>       | AGGAGGCCTCTTCTGCTACCACTTTT<br>GATG | GAAGGCAGCTCCGACCATGAAGTGCT<br>GTGT |
| <i>LepR-Cre</i>        | ATGTCCAATTTACTGACCGTACA            | CGCATAACCAGTGAAACAGCATT            |
| <i>Rosa26-tdTomato</i> | GGCATTAAAGCAGCGTATCC               | CTGTTCTGTACGGCATGG                 |

42

43 **Supplemental Table 9. List of primers used for deletion PCR.**

| Gene          | Forward (5'-3')            | Reverse (5'-3')         |
|---------------|----------------------------|-------------------------|
| <i>Slc7a5</i> | GGCTCCTGGACTTATCTTGACCAATG | GTGGTGCTTTGCTGAAGGCAGGG |

44

45 **Supplemental Table 10. List of primers used for real-time PCR.**

| Gene          | Forward (5'-3')          | Reverse (5'-3')          |
|---------------|--------------------------|--------------------------|
| <i>Adrb3</i>  | TGCGCACCTTAGGTCTCATTATGG | AAACTCCGCTGGGAACTAGAGAGG |
| <i>Cidea</i>  | ATCACAACCTGGCCTGGTTACG   | TACTACCCGGTGTCCATTTCT    |
| <i>Cox5b</i>  | GCTGCATCTGTGAAGAGGACAAC  | CAGCTTGTAATGGGTCCACAGT   |
| <i>Cox7a1</i> | CAGCGTCATGGTCAGTCTGT     | AGAAAACCGTGTGGCAGAGA     |
| <i>Cox8b</i>  | GAACCATGAAGCCAACGACT     | GCGAAGTTCACAGTGGTTCC     |
| <i>Cycl</i>   | GCTACCCATGGTCTCATCGT     | CATCATCATTAGGGCCATCC     |
| <i>Dio2</i>   | GGTGGTCAACTTTGGTTCAGCC   | AAGTCAGCCACCGAGGAGAACT   |
| <i>Gapdh</i>  | AGGTCGGTGTGAACGGATTG     | TGTAGACCATGTAGTTGAGGTCA  |
| <i>Il6</i>    | CACCAAGAACGATAGTCAATTCCA | TCACCAGCATCAGTCCCAAG     |
| <i>Nrf1</i>   | CAACAGGGAAGAAACGGAAA     | GCACCACATTCTCCAAAGGT     |
| <i>Nrf2</i>   | AGGTTGCCACATTCCCAAACAAG  | TTGCTCCATGTCCTGCTCTATGCT |
| <i>Pgc1a</i>  | GAATCAAGCCACTACAGACACCG  | CATCCCTCTTGAGCCTTTCGTG   |
| <i>Tfam</i>   | GTCCATAGGCACCGTATTGC     | CCCATGCTGGAAAAACACTT     |
| <i>Ucp1</i>   | TACCAAGCTGTGCGATGTCC     | GCACACAAACATGATGACGTTCC  |

46

47 **Supplemental Table 11. List of primers used for real-time PCR to quantify mtDNA.**

| Gene               | Forward (5'-3')         | Reverse (5'-3')          |
|--------------------|-------------------------|--------------------------|
| <i>mtDNA</i>       | CCGCAAGGGAAGATGAAAGAC   | TCGTTTGGTTTCGGGGTTTC     |
| <i>Nuclear DNA</i> | GCCAGCCTCTCCTGATTTAGTGT | GGGAACACAAAAGACCTCTTCTGG |

48
